# Supplementary material for: TRAIL-R2 promotes skeletal metastasis in a breast cancer xenograft mouse model
Source: PubMed Central journal article supplement (PMC4496234; doi:10.18632/oncotarget.3321), 2015-03-25
Supplement: oncotarget-06-9502-s001.pdf [file oncotarget-06-9502-s001.pdf]

## SUPPLEMENTARY FIGURE AND TABLES

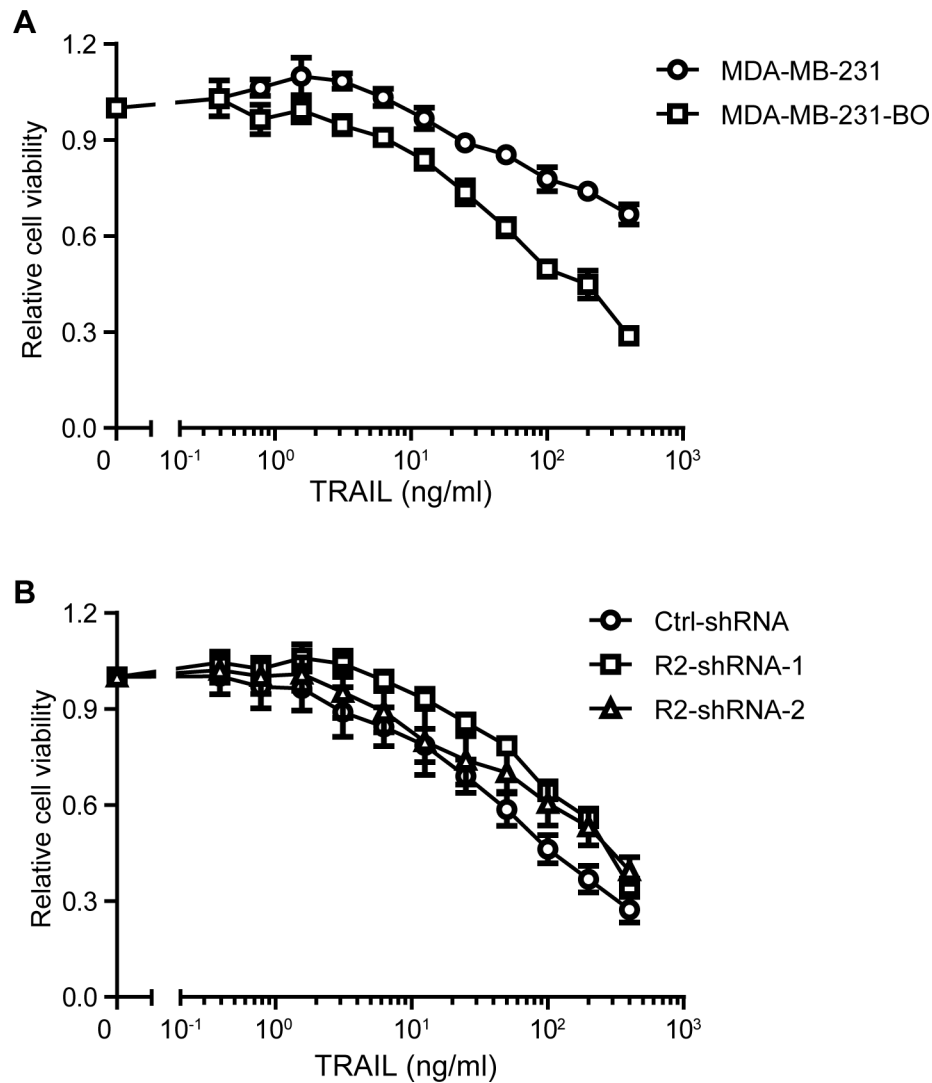

**Supplementary Figure S1: Elevated levels of TRAIL-R2 are associated with greater sensitivity to TRAIL-mediated cell death.** 24 h after seeding (96-well plates,  $1 \times 10^4$  cells/well), parental MDA-MB-231 and the bone-homing MDA-MB-231-BO (A), as well as control cells and cells expressing TRAIL-R2-shRNAs (B), were treated for 48 h with increasing concentrations of TRAIL. Cell viability was assessed by crystal violet staining as previously described (Siegmond *et al.*, (2005); Mol. Cell. Biol. 25, 6363). Graphs represent average values  $\pm$  SD. ( $n = 6$ ).

**Supplementary Table S1: Quantification of FACS analyses performed on TRAIL-R2 knockdown cells** TRAIL-R2 knockdown cells (R2-shRNA-1 or R2-shRNA-2) were analyzed in regard to the expression of TRAIL-R1, TRAIL-R2, CXCR4 and EGFR by flow cytometry. Percent of stained cells (A), as well as staining intensities per cell (B), relative to non-specific antibody controls, were quantified and fold changes relative to control calculated. Values represent fold change  $\pm$  SD.

| A        | Non-permeabilized |                 | Permeabilized   |                 |
|----------|-------------------|-----------------|-----------------|-----------------|
|          | R2-shRNA-1        | R2-shRNA-2      | R2-shRNA-1      | R2-shRNA-2      |
| TRAIL-R2 | 0.54 $\pm$ 0.14   | 0.43 $\pm$ 0.10 | 0.24 $\pm$ 0.04 | 0.23 $\pm$ 0.06 |
| TRAIL-R1 | 0.91 $\pm$ 0.28   | 1.00 $\pm$ 0.30 | 1.07 $\pm$ 0.10 | 1.06 $\pm$ 0.14 |
| CXCR4    | 0.25 $\pm$ 0.09   | 0.24 $\pm$ 0.05 | 0.45 $\pm$ 0.04 | 0.40 $\pm$ 0.09 |
| EGFR     | 1.01 $\pm$ 0.05   | 0.99 $\pm$ 0.05 | 1.00 $\pm$ 0.04 | 1.00 $\pm$ 0.04 |

| B        | Non-permeabilized |                 | Permeabilized   |                 |
|----------|-------------------|-----------------|-----------------|-----------------|
|          | R2-shRNA-1        | R2-shRNA-2      | R2-shRNA-1      | R2-shRNA-2      |
| TRAIL-R2 | 0.50 $\pm$ 0.15   | 0.53 $\pm$ 0.08 | 0.32 $\pm$ 0.08 | 0.32 $\pm$ 0.10 |
| TRAIL-R1 | 0.95 $\pm$ 0.22   | 0.94 $\pm$ 0.22 | 0.94 $\pm$ 0.16 | 0.99 $\pm$ 0.15 |
| CXCR4    | 0.36 $\pm$ 0.10   | 0.45 $\pm$ 0.10 | 0.30 $\pm$ 0.08 | 0.28 $\pm$ 0.08 |
| EGFR     | 0.97 $\pm$ 0.09   | 0.98 $\pm$ 0.07 | 0.95 $\pm$ 0.09 | 0.94 $\pm$ 0.13 |

**Supplementary Table S2: Quantification of FACS analyses performed on TRAIL-R2 overexpressing cells** MDA-MB-231 cells overexpressing the long (R2-long) or short (R2-short) isoforms were analyzed by flow cytometry in regard to the expression of TRAIL-R2, CXCR4 and EGFR. Percent of stained cells (A), as well as staining intensities per cell (B), relative to non-specific antibody controls, were quantified and fold changes relative to control calculated. Values represent fold change  $\pm$  SD.

| A        | Non-permeabilized |                 | Permeabilized   |                 |
|----------|-------------------|-----------------|-----------------|-----------------|
|          | R2-long           | R2-short        | R2-long         | R2-short        |
| TRAIL-R2 | 1.32 $\pm$ 0.24   | 1.62 $\pm$ 0.42 | 1.87 $\pm$ 0.24 | 1.99 $\pm$ 0.42 |
| CXCR4    | 2.15 $\pm$ 0.14   | 2.39 $\pm$ 0.28 | 1.80 $\pm$ 0.24 | 1.79 $\pm$ 0.29 |
| EGFR     | 0.99 $\pm$ 0.03   | 0.98 $\pm$ 0.04 | 0.99 $\pm$ 0.04 | 1.00 $\pm$ 0.05 |

| B        | Non-permeabilized |                 | Permeabilized   |                 |
|----------|-------------------|-----------------|-----------------|-----------------|
|          | R2-long           | R2-short        | R2-long         | R2-short        |
| TRAIL-R2 | 1.48 $\pm$ 0.26   | 1.67 $\pm$ 0.32 | 2.42 $\pm$ 0.28 | 2.33 $\pm$ 0.37 |
| CXCR4    | 1.43 $\pm$ 0.25   | 1.49 $\pm$ 0.24 | 2.38 $\pm$ 0.44 | 2.37 $\pm$ 0.28 |
| EGFR     | 0.99 $\pm$ 0.08   | 0.98 $\pm$ 0.06 | 0.98 $\pm$ 0.06 | 1.00 $\pm$ 0.07 |
